# Supplementary material
Source: PubMed Central journal article supplement (PMC6202179)
Supplement: NIHMS955746-supplement-TF.pdf [file NIHMS955746-supplement-TF.pdf]

# Supplementary Tables

**Supplementary Table 1.** Small molecule screening data

| Category          | Parameter                                | Description                                                                                                                                                                                                                                                                                                                                                                                                                                                                                                                                                                                                                                           |
|-------------------|------------------------------------------|-------------------------------------------------------------------------------------------------------------------------------------------------------------------------------------------------------------------------------------------------------------------------------------------------------------------------------------------------------------------------------------------------------------------------------------------------------------------------------------------------------------------------------------------------------------------------------------------------------------------------------------------------------|
| Assay             | Type of assay                            | Competition with FP-TMR binding                                                                                                                                                                                                                                                                                                                                                                                                                                                                                                                                                                                                                       |
|                   | Target                                   | Multiple active hydrolases in live <i>S. aureus</i>                                                                                                                                                                                                                                                                                                                                                                                                                                                                                                                                                                                                   |
|                   | Primary measurement                      | Fluorescence scan after SDS-PAGE analysis of probe-labeled lysate                                                                                                                                                                                                                                                                                                                                                                                                                                                                                                                                                                                     |
|                   | Key reagents                             | FP-TMR                                                                                                                                                                                                                                                                                                                                                                                                                                                                                                                                                                                                                                                |
|                   | Assay protocol                           | <i>S. aureus</i> ATCC3556 was plated out on TSAMg and grown for 48-72 hours. Cells were scraped off plates and resuspended in TSB at OD <sub>600</sub> of 60-100. 0.5 μL of each of 7 compounds of serine-reactive compound library (1 mM in DMSO) were pooled in a microtube and 46 μL of the bacterial suspension were added. Samples were incubated at 37 °C, 300 rpm for 60 min and 1 μL of FP-TMR (50 μM stock in DMSO) was added. After 30 min incubation at 37 °C, samples were centrifuged and the supernatant discarded. Bacterial pellets were resuspended in 400 μL ice-cold PBS/0.1% SDS, lysed by bead-beating and analyzed by SDS-PAGE. |
|                   | Additional comments                      | -                                                                                                                                                                                                                                                                                                                                                                                                                                                                                                                                                                                                                                                     |
| Library           | Library size                             | ~500                                                                                                                                                                                                                                                                                                                                                                                                                                                                                                                                                                                                                                                  |
|                   | Library composition                      | Small molecules with serine-reactive electrophiles                                                                                                                                                                                                                                                                                                                                                                                                                                                                                                                                                                                                    |
|                   | Source                                   | Bogyo Lab, Stanford University                                                                                                                                                                                                                                                                                                                                                                                                                                                                                                                                                                                                                        |
|                   | Additional comments                      | -                                                                                                                                                                                                                                                                                                                                                                                                                                                                                                                                                                                                                                                     |
| Screen            | Format                                   | 12 microtubes per 96 well plate, multiplexed                                                                                                                                                                                                                                                                                                                                                                                                                                                                                                                                                                                                          |
|                   | Concentration(s) tested                  | 10 μM                                                                                                                                                                                                                                                                                                                                                                                                                                                                                                                                                                                                                                                 |
|                   | Plate controls                           | DMSO, Non-fluorescent probe analog FP-biotin                                                                                                                                                                                                                                                                                                                                                                                                                                                                                                                                                                                                          |
|                   | Reagent/ compound dispensing system      | Manual                                                                                                                                                                                                                                                                                                                                                                                                                                                                                                                                                                                                                                                |
|                   | Detection instrument and software        | Typhoon 9410 variable mode imager (TAMRA channel, λ <sub>ex</sub> = 380, 580 BP filter) with Typhoon Scanner Control v 5.0 software                                                                                                                                                                                                                                                                                                                                                                                                                                                                                                                   |
|                   | Assay validation/QC                      | -                                                                                                                                                                                                                                                                                                                                                                                                                                                                                                                                                                                                                                                     |
|                   | Correction factors                       | -                                                                                                                                                                                                                                                                                                                                                                                                                                                                                                                                                                                                                                                     |
|                   | Normalization                            | -                                                                                                                                                                                                                                                                                                                                                                                                                                                                                                                                                                                                                                                     |
|                   | Additional comments                      | Individual compounds of active pools were rescreened. Compounds showing >50% competition with FP-TMR of at least one band were tested in dose-response (100 μM – 160 nM)                                                                                                                                                                                                                                                                                                                                                                                                                                                                              |
| Post-HTS analysis | Hit criteria                             | >90% inhibition of one hydrolase with no detectable activity against secondary targets at any concentration in the dose-response curve                                                                                                                                                                                                                                                                                                                                                                                                                                                                                                                |
|                   | Hit rate                                 | 1.8%                                                                                                                                                                                                                                                                                                                                                                                                                                                                                                                                                                                                                                                  |
|                   | Additional assay(s)                      | -                                                                                                                                                                                                                                                                                                                                                                                                                                                                                                                                                                                                                                                     |
|                   | Confirmation of hit purity and structure | LC-MS                                                                                                                                                                                                                                                                                                                                                                                                                                                                                                                                                                                                                                                 |
|                   | Additional comments                      | -                                                                                                                                                                                                                                                                                                                                                                                                                                                                                                                                                                                                                                                     |

**Supplementary Table 2.** List of serine hydrolases identified by LC/LC-MS/MS analysis

| Gene                      | Previous annotation                           | Mw (DA), full length | strain NCTC8325 gene locus tag | strain Newman locus tag | strain USA300 locus tag |
|---------------------------|-----------------------------------------------|----------------------|--------------------------------|-------------------------|-------------------------|
| <i>gehA</i> <sup>27</sup> | <i>S. aureus</i> lipase 1 (SAL1)              | 76675                | SAOUHSC_03006                  | NWMN_2569               | SAUSA300_2603           |
| <i>gehB</i> <sup>27</sup> | <i>S. aureus</i> lipase 2 (SAL2)              | 76388                | SAOUHSC_00300                  | NWMN_0262               | SAUSA300_0320           |
| <i>fphA</i>               | Para-nitrobenzyl esterase                     | 51969                | SAOUHSC_02751                  | NWMN_2350               | SAUSA300_2396           |
| <i>fphB</i>               | Acetyl esterase/lipase                        | 36848                | SAOUHSC_02844                  | NWMN_2434               | SAUSA300_2473           |
| <i>fphC</i>               | Alpha/beta hydrolase                          | 35256                | SAOUHSC_01279                  | NWMN_1210               | SAUSA300_1194           |
| <i>fphD</i>               | Alpha/beta hydrolase                          | 33186                | SAOUHSC_02448                  | NWMN_2092               | SAUSA300_2148           |
| <i>fphE</i>               | Hydrolase family protein; H30 <sup>o</sup>    | 31006                | SAOUHSC_02900                  | NWMN_2480               | SAUSA300_2518           |
| <i>fphF</i>               | Putative tributyrin esterase                  | 29096                | SAOUHSC_02962                  | NWMN_2528               | SAUSA300_2564           |
| <i>fphG</i>               | Alpha/beta hydrolase                          | 28362                | SAOUHSC_01912                  | NWMN_1683               | SAUSA300_1733           |
| <i>fphH</i>               | Carboxylesterase; E28 <sup>6</sup>            | 28094                | SAOUHSC_00802                  | NWMN_0784               | SAUSA300_0763           |
| <i>fphI</i>               | Carboxylesterase                              | 27443                | SAOUHSC_00417                  | NWMN_0422               | SAUSA300_0430           |
| <i>fphJ</i>               | Phospholipase/carboxylesterase family protein | 21783                | SAOUHSC_02824                  | NWMN_2416               | SAUSA300_2457           |

**Supplementary Table 3.** Bioinformatic analyses of FphB protein sequence

| Tool           | Result                                                                                                                                               |
|----------------|------------------------------------------------------------------------------------------------------------------------------------------------------|
| SignalP        | No signal peptide                                                                                                                                    |
| Secretome P2.0 | Not secreted                                                                                                                                         |
| psortb v 3.0   | Localization scores:<br>Cytoplasmic 7.50;<br>Cytoplasmic membrane 1.15<br>Extracellular 0.73<br>Cell wall 0.62                                       |
| Phobius        | N-terminus cleaved after amino acid 18                                                                                                               |
| Signal3L-2.0   | Cleave site after amino acid 18 (Score=1). Input sequence does not include a signal peptide, but may include a N-terminal transmembrane helix (TMH). |
| MemBrain       | N-terminal signal peptide: not detected;<br>Predicted Transmembrane Helix (TMH): #1 TMH: 7-18 (possible half-TMH)                                    |
| TmPred         | STRONGLY preferred model: N-terminus inside, 1 strong transmembrane helices from amino acid 5 - 20, total score : 1004                               |

**Supplementary Table 4. Bacterial strains used in this study**

| Strain                                                            | Description                                                                                                                                  | Reference/Source                      |
|-------------------------------------------------------------------|----------------------------------------------------------------------------------------------------------------------------------------------|---------------------------------------|
| <i>S. aureus</i> ATCC3556                                         | Restriction-deficient mutant derived from strain NCTC 8325, MSSA, biofilm-forming                                                            | <sup>52,53</sup>                      |
| <i>S. aureus</i> strain Newman                                    | Wild-type clinical osteomyelitis isolate                                                                                                     | <sup>54</sup>                         |
| <i>S. aureus</i> strain Newman-pCM29                              | WT Newman strain with GFP plasmid pCM29; Cm <sup>R</sup>                                                                                     | Plasmid in <sup>51</sup> . This work. |
| NWMN_SAL1:: $\phi N\Sigma$ (NWMN_2569:: $\phi N\Sigma$ )          | Transposon insertion mutant in NWMN_2569 (SAL1); Ery <sup>R</sup> , Linc <sup>R</sup>                                                        | This work                             |
| NWMN_SAL2:: $\phi N\Sigma$ (NWMN_0262:: $\phi N\Sigma$ )          | Transposon insertion mutant in NWMN_0262 ( <i>lip2</i> , SAL2); homolog to SAUSA300_0320, SAOUHSC00300 Ery <sup>R</sup> , Linc <sup>R</sup>  | This work                             |
| NWMN_ <i>fphA</i> :: $\phi N\Sigma$ (NWMN_2350:: $\phi N\Sigma$ ) | Transposon insertion mutant in NWMN_2350 ( <i>fphA/pnbA</i> ); homolog to SAUSA300_2396, SAOUHSC_02751; Ery <sup>R</sup> , Linc <sup>R</sup> | This work                             |
| NWMN_ <i>fphB</i> :: $\phi N\Sigma$ (NWMN_2434:: $\phi N\Sigma$ ) | Transposon insertion mutant in NWMN_2434 ( <i>fphB</i> ); homolog to SAOUHSC_02844, SAUSA300_2473 Ery <sup>R</sup> , Linc <sup>R</sup>       | This work                             |
| NWMN_ <i>fphC</i> :: $\phi N\Sigma$ (NWMN_1210:: $\phi N\Sigma$ ) | Transposon insertion mutant in NWMN_1210 ( <i>fphC</i> ); homolog to SAUSA300_1194, SAOUHSC_01279 Ery <sup>R</sup> , Linc <sup>R</sup>       | This work                             |
| NWMN_ <i>fphD</i> :: $\phi N\Sigma$ (NWMN_2092:: $\phi N\Sigma$ ) | Transposon insertion mutant in NWMN_2092 ( <i>fphD</i> ); homolog to SAUSA300_2148, SOUHSC_02448 Ery <sup>R</sup> , Linc <sup>R</sup>        | This work                             |
| NWMN_ <i>fphE</i> :: $\phi N\Sigma$ (WMN_2480:: $\phi N\Sigma$ )  | Transposon insertion mutant in NWMN_2480 ( <i>fphE</i> ); homolog to SAUSA300_2518, SAOUHSC_02900 Ery <sup>R</sup> , Linc <sup>R</sup>       | This work                             |
| NWMN_ <i>fphF</i> :: $\phi N\Sigma$ (NWMN_2528:: $\phi N\Sigma$ ) | Transposon insertion mutant in NWMN_2528 ( <i>fphF/estA</i> ); homolog to SAUSA300_2564, SAOUHSC_02962; Ery <sup>R</sup> , Linc <sup>R</sup> | This work                             |
| NWMN_ <i>fphG</i> :: $\phi N\Sigma$ (NWMN_1683:: $\phi N\Sigma$ ) | Transposon insertion mutant in NWMN_1683 ( <i>fphG</i> ); homolog to SAUSA300_1733, SOUHSC_01912 Ery <sup>R</sup> , Linc <sup>R</sup>        | This work                             |
| NWMN_ <i>fphH</i> :: $\phi N\Sigma$ (NWMN_0784:: $\phi N\Sigma$ ) | Transposon insertion mutant in NWMN_0784 ( <i>fphH</i> ); homolog to SAUSA300_0763, SAOUHSC_00802 Ery <sup>R</sup> , Linc <sup>R</sup>       | This work                             |
| NWMN_0169:: $\phi N\Sigma$                                        | Transposon insertion mutant in NWMN_0169; homolog to SAUSA300_0227 Ery <sup>R</sup> , Linc <sup>R</sup>                                      | This work                             |
| NWMN_2379:: $\phi N\Sigma$                                        | Transposon insertion mutant in NWMN_2379; homolog to SAUSA300_2424 and SOUHSC02783 Ery <sup>R</sup> , Linc <sup>R</sup>                      | This work                             |

|                                                    |                                                                                                                                    |                                              |
|----------------------------------------------------|------------------------------------------------------------------------------------------------------------------------------------|----------------------------------------------|
| USA300 LAC                                         | Wild-type USA300 Los Angeles County (LAC) clone; multilocus sequence type 8, SCCmec type IV cured of antibiotic resistance plasmid | <sup>55</sup>                                |
| SAUSA300_0227:: $\phi N\Sigma$                     | Transposon insertion mutant in SAUSA300_0227; Ery <sup>R</sup> , Linc <sup>R</sup>                                                 | Nebraska Transposon Mutant Library           |
| SAUSA300_0320:: $\phi N\Sigma$                     | Transposon insertion mutant in SAUSA300_0320; Ery <sup>R</sup> , Linc <sup>R</sup>                                                 | Nebraska Transposon Mutant Library           |
| SAUSA300_0763:: $\phi N\Sigma$                     | Transposon insertion mutant in SAUSA300_0763; Ery <sup>R</sup> , Linc <sup>R</sup>                                                 | Nebraska Transposon Mutant Library           |
| SAUSA300_1194:: $\phi N\Sigma$                     | Transposon insertion mutant in SAUSA300_1194; Ery <sup>R</sup> , Linc <sup>R</sup>                                                 | Nebraska Transposon Mutant Library           |
| SAUSA300_1733:: $\phi N\Sigma$                     | Transposon insertion mutant in SAUSA300_1733; Ery <sup>R</sup> , Linc <sup>R</sup>                                                 | Nebraska Transposon Mutant Library           |
| SAUSA300_2148:: $\phi N\Sigma$                     | Transposon insertion mutant in SAUSA300_2148; Ery <sup>R</sup> , Linc <sup>R</sup>                                                 | Nebraska Transposon Mutant Library           |
| SAUSA300_2396:: $\phi N\Sigma$                     | Transposon insertion mutant in SAUSA300_2396; Ery <sup>R</sup> , Linc <sup>R</sup>                                                 | Nebraska Transposon Mutant Library           |
| SAUSA300_2424:: $\phi N\Sigma$                     | Transposon insertion mutant in SAUSA300_2424; Ery <sup>R</sup> , Linc <sup>R</sup>                                                 | Nebraska Transposon Mutant Library           |
| SAUSA300_2473:: $\phi N\Sigma$                     | Transposon insertion mutant in SAUSA300_2473; Ery <sup>R</sup> , Linc <sup>R</sup>                                                 | Nebraska Transposon Mutant Library           |
| SAUSA300_2518:: $\phi N\Sigma$                     | Transposon insertion mutant in SAUSA300_2518; Ery <sup>R</sup> , Linc <sup>R</sup>                                                 | Nebraska Transposon Mutant Library           |
| SAUSA300_2603:: $\phi N\Sigma$                     | Transposon insertion mutant in SAUSA300_2473; Ery <sup>R</sup> , Linc <sup>R</sup>                                                 | Nebraska Transposon Mutant Library           |
| <i>S. epidermidis</i>                              | Wild-type strain                                                                                                                   | From Elizabeth Joyce, UCSF                   |
| <i>L. monocytogenes</i> 10403S pMP4 (inIA11-1Topo) | HF HS pfu ultra and primer 1 /2 amplified inIA from DH-L-1039 (10403S GFP)                                                         | <sup>56</sup>                                |
| <i>H. pylori</i> G27MA                             | MDCK-adapted strain from G27 wild type (isolated from patient with peptic ulcer disease)                                           | <sup>57</sup>                                |
| <i>E. coli</i> K12 (MG1655)                        | F <sup>-</sup> , $\lambda^-$ , <i>rph-1</i>                                                                                        | Coli Genetic Stock Center at Yale University |
| <i>S. typhimurium</i> SL1344                       | Wild-type strain                                                                                                                   | <sup>60</sup>                                |

## REFERENCES

51. Pang, Y. Y. *et al.* agr-Dependent interactions of *Staphylococcus aureus* USA300 with human polymorphonuclear neutrophils. *J Innate Immun* **2**, 546-559, doi:10.1159/000319855 (2010).
52. Gross, M., Cramton, S. E., Gotz, F. & Peschel, A. Key role of teichoic acid net charge in *Staphylococcus aureus* colonization of artificial surfaces. *Infect Immun* **69**, 3423-3426, doi:10.1128/IAI.69.5.3423-3426.2001 (2001).



53. Wu, J. A., Kusuma, C., Mond, J. J. & Kokai-Kun, J. F. Lysostaphin disrupts *Staphylococcus aureus* and *Staphylococcus epidermidis* biofilms on artificial surfaces. *Antimicrob Agents Chemother* **47**, 3407-3414 (2003).
54. Duthie, E. S. & Lorenz, L. L. Staphylococcal coagulase; mode of action and antigenicity. *J Gen Microbiol* **6**, 95-107, doi:10.1099/00221287-6-1-2-95 (1952).
55. Arsic, B., Zhu, Y., Heinrichs, D. E. & McGavin, M. J. Induction of the staphylococcal proteolytic cascade by antimicrobial fatty acids in community acquired methicillin resistant *Staphylococcus aureus*. *PLoS One* **7**, e45952, doi:10.1371/journal.pone.0045952 (2012).
56. Pentecost, M., Kumaran, J., Ghosh, P. & Amieva, M. R. *Listeria monocytogenes* internalin B activates junctional endocytosis to accelerate intestinal invasion. *PLoS Pathog* **6**, e1000900, doi:10.1371/journal.ppat.1000900 (2010).
57. Amieva, M. R. *et al.* Disruption of the epithelial apical-junctional complex by *Helicobacter pylori* CagA. *Science* **300**, 1430-1434, doi:10.1126/science.1081919 (2003).
58. Sanman, L. E. *et al.* Disruption of glycolytic flux is a signal for inflammasome signaling and pyroptotic cell death. *Elife* **5**, e13663, doi:10.7554/eLife.13663 (2016).

**Supplementary Table 5.** Oligonucleotides used in this study

| Primer pair           | Sequence (5'-3')                                          | Application                                                                                                      |
|-----------------------|-----------------------------------------------------------|------------------------------------------------------------------------------------------------------------------|
| SAUSA300_0227-F and R | F: TGACAGTCATCTTAGCCTCT<br>R: AGCGTTTACAAATAAAGCGTGT      | PCR confirmation of SAUSA300_0227:: $\phi N_{\Sigma}$ and successful generation of NWMN_0169:: $\phi N_{\Sigma}$ |
| SAUSA300_0320-F and R | F: TCAACACCACAACACTAAAAGTGTT<br>R: GCCTGTCCCTTTAGTTTTTCGC | PCR confirmation of SAUSA300_0320:: $\phi N_{\Sigma}$ and successful generation of NWMN_0262:: $\phi N_{\Sigma}$ |
| SAUSA300_0763-F and R | F: AAGTATGCAAAGGGAGCGTT<br>R: TCATTATGCCCTCCTTTCT         | PCR confirmation of SAUSA300_0763:: $\phi N_{\Sigma}$ and successful generation of NWMN_0748:: $\phi N_{\Sigma}$ |

|                       |                                                            |                                                                                                                  |
|-----------------------|------------------------------------------------------------|------------------------------------------------------------------------------------------------------------------|
| SAUSA300_1194-F and R | F: TGTCCTGTTTTAAGGGCATCA<br>R: AGCAGTTGGCCCCACAATTA        | PCR confirmation of SAUSA300_1194:: $\varphi N\Sigma$ and successful generation of NWMN_1210:: $\varphi N\Sigma$ |
| SAUSA300_1733-F and R | F: ACCGATCCCTAATTCAACGCA<br>R: ACTCGCACACGGAGTTTCT         | PCR confirmation of SAUSA300_1733:: $\varphi N\Sigma$ and successful generation of NWMN_1683:: $\varphi N\Sigma$ |
| SAUSA300_2148-F and R | F: ACGACTTAGACATTTTATGGAACT<br>R: TGTATTCAAATCAACTAAAGGACA | PCR confirmation of SAUSA300_2148:: $\varphi N\Sigma$ and successful generation of NWMN_2092:: $\varphi N\Sigma$ |
| SAUSA300_2396-F and R | F: AGCTCGTCTGATTCAGTCACAA<br>R: GCACGCCTGCTATCAAATTCA      | PCR confirmation of SAUSA300_2396:: $\varphi N\Sigma$ and successful generation of NWMN_2350:: $\varphi N\Sigma$ |
| SAUSA300_2424-F and R | F: TCGAACTTGTTTCTTCAGAGT<br>R: AAATAATTTTTCGCTTTAGTTGTAA   | PCR confirmation of SAUSA300_2424:: $\varphi N\Sigma$ and successful generation of NWMN_2379:: $\varphi N\Sigma$ |
| SAUSA300_2473-F and R | F: ACTCTGATAATCACTTTAGCAAGTA<br>R: TCAGCATGGTACAGTAGAACT   | PCR confirmation of SAUSA300_2473:: $\varphi N\Sigma$ and successful generation of NWMN_2434:: $\varphi N\Sigma$ |
| SAUSA300_2518-F and R | F: TGAAGTGGGTTTAAACAGATGAAGA<br>R: AAGCTTGGTCAGCCATCAAA    | PCR confirmation of SAUSA300_2518:: $\varphi N\Sigma$ and successful generation of NWMN_2480:: $\varphi N\Sigma$ |
| SAUSA300_2603-F and R | F: TGACTTTCCGCCAGCTTCTT<br>R: GGATGGTCATTATGAGTGCTTGG      | PCR confirmation of SAUSA300_2564:: $\varphi N\Sigma$ and successful generation of NWMN_2569:: $\varphi N\Sigma$ |
| SAOUHSC02844_Fw_BamHI | ACGAGGATCCCGTAAAAAATGGTCTACACT                             | Forward primer for SAOUHSC02844 cloning with BamHI site                                                          |
| SAOUHSC02844_Rv_XhoI  | GTTTCTCGAGTTAGTTAATAATTTTTCACTTGG                          | Reverse primer for SAOUHSC02844 cloning with XhoI site                                                           |

## Supplementary Figures

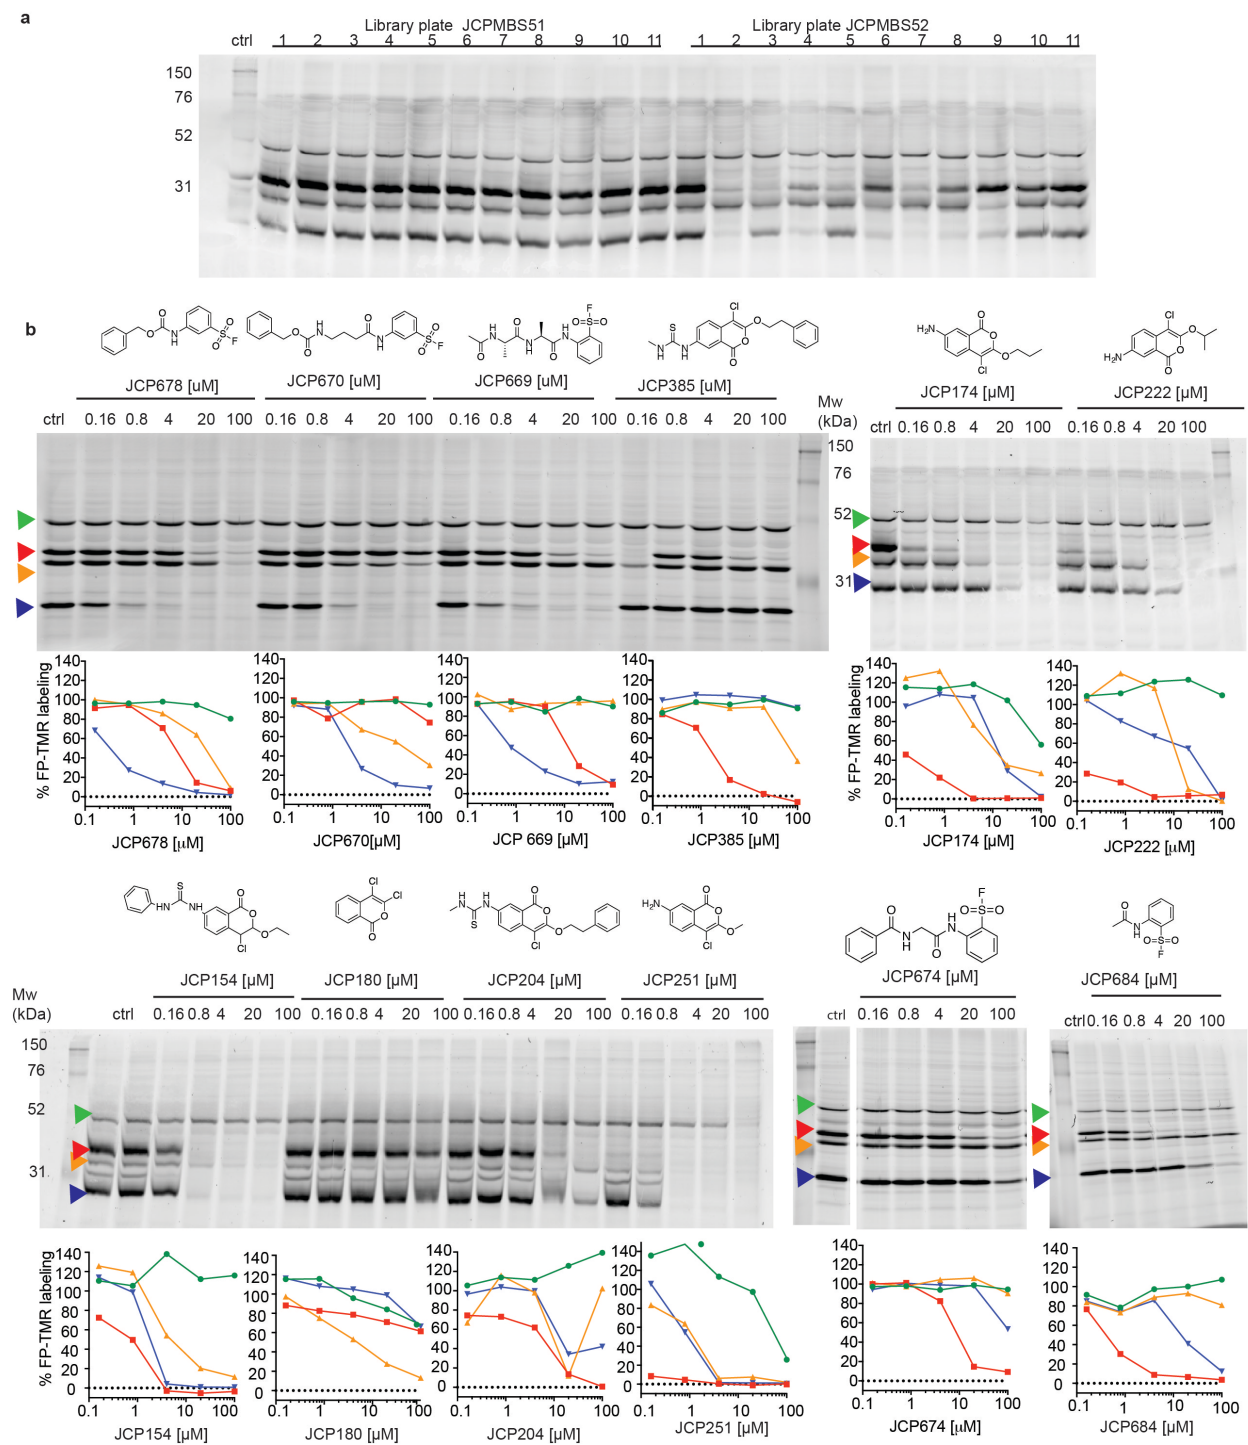

**Supplementary Figure 1. Competitive activity-based protein profiling screen for inhibitors of serine hydrolases in *S. aureus*.** a) SDS-PAGE gel images of samples of *S. aureus*

ATCC35556 grown on TSBMg Agar, suspended in TSB at  $\sim OD_{600} = 50 - 100$ , pre-incubated with mixtures of 7 library compounds (at  $10 \mu M$  each) for 60 min, and then labeled with FP-TMR ( $1 \mu M$ ) for 30 min. Samples were lysed, separated on an SDS-gel and TMR-fluorescence imaged using a flatbed laser scanner. Exemplary data are shown from two primary screening plates. b) SDS-PAGE images of competition profiles of the indicated hit molecules after deconvolution from the pools of 7 compounds. Images show 14 individual screening hit compounds tested in dose-response for competition with FP-TMR labeling ( $1 \mu M$ ) to evaluate potency and selectivity. Colored arrowheads indicate consistently observed serine hydrolase activities. Lower panels show quantification of FP-TMR-labeling intensities for hydrolase bands 1 (green), 2 (red: FphB), 3 (orange) and 4 (blue: FphF) in competition with the indicated compounds. Band intensities after compound pretreatment were normalized to the corresponding intensities achieved under control conditions (vehicle treatment). Band quantification was done using Image Studio Lite V 5.2.5. For JCP251 and JCP678 the experiment was performed twice with similar results, for all other compounds these dose-response curves were recorded once as part of the hit validation procedure.

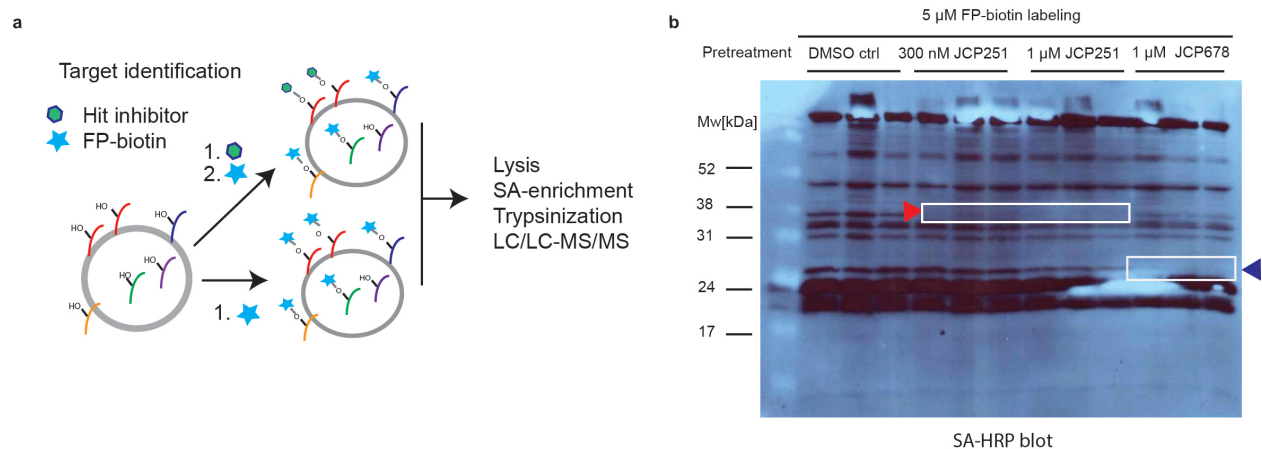

**Supplementary Figure 2. Competition labeling of JCP251 and JCP678 with FP-biotin.** a) Schematic representation of MS-based serine hydrolase profiling and target identification using FP-biotin. b) Image of an anti-biotin affinity blot of an SDS-PAGE gel containing samples of *S. aureus* ATCC35556 pretreated with the indicated inhibitors at the specified concentrations or vehicle control before labeling with FP-biotin ( $5 \mu M$ ). Red arrowhead and box indicate the primary target of JCP251, blue arrowhead and box indicate the primary target of JCP678. The experiment was performed twice with similar results.

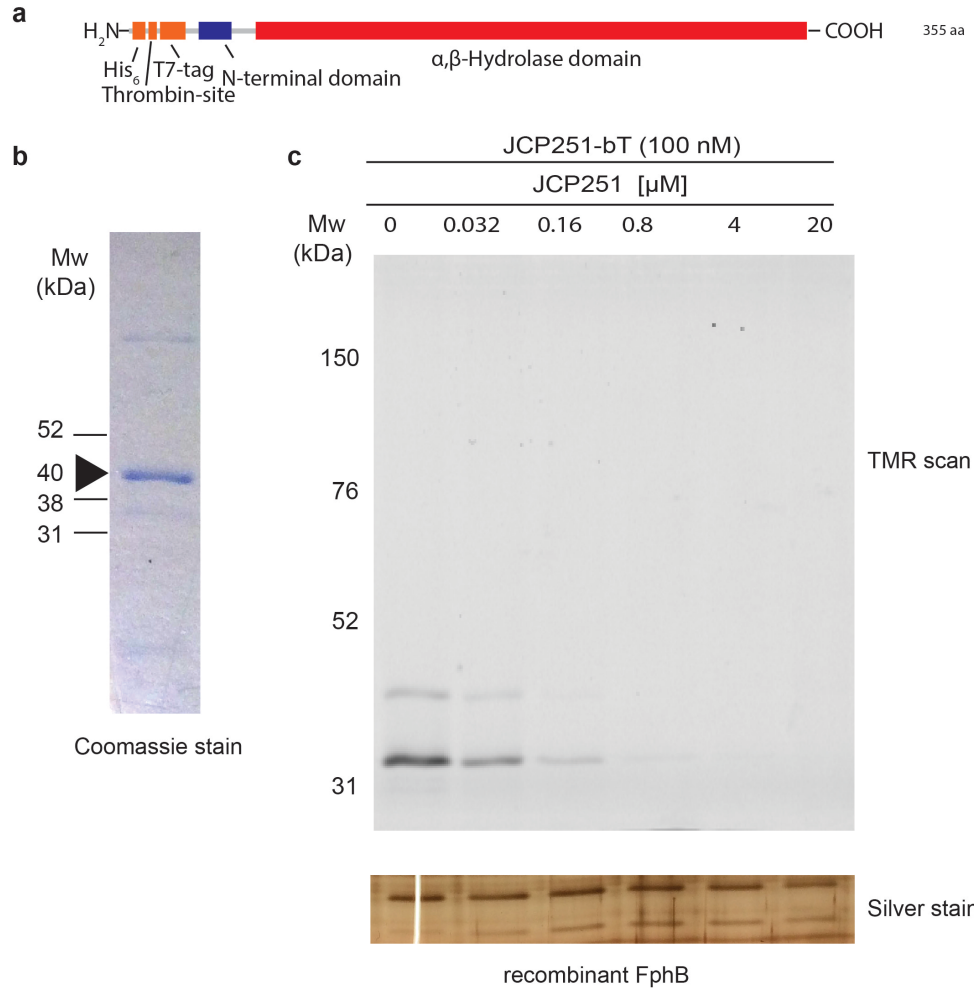

**Supplementary Figure 3. Purification, ABP-labeling and functional characterization of recombinant FphB.** a) Predicted protein domain overview of recombinant FphB. b) SDS-PAGE analysis of purified rFphB protein, visualized by Coomassie staining. c) SDS-PAGE analysis (TMR-scan in upper panel and silver stain as loading control in lower panel) of rFphB labeled with JCP251-bdpTMR after pre-incubation with different concentrations of JCP251. The experiments were repeated twice with similar results.

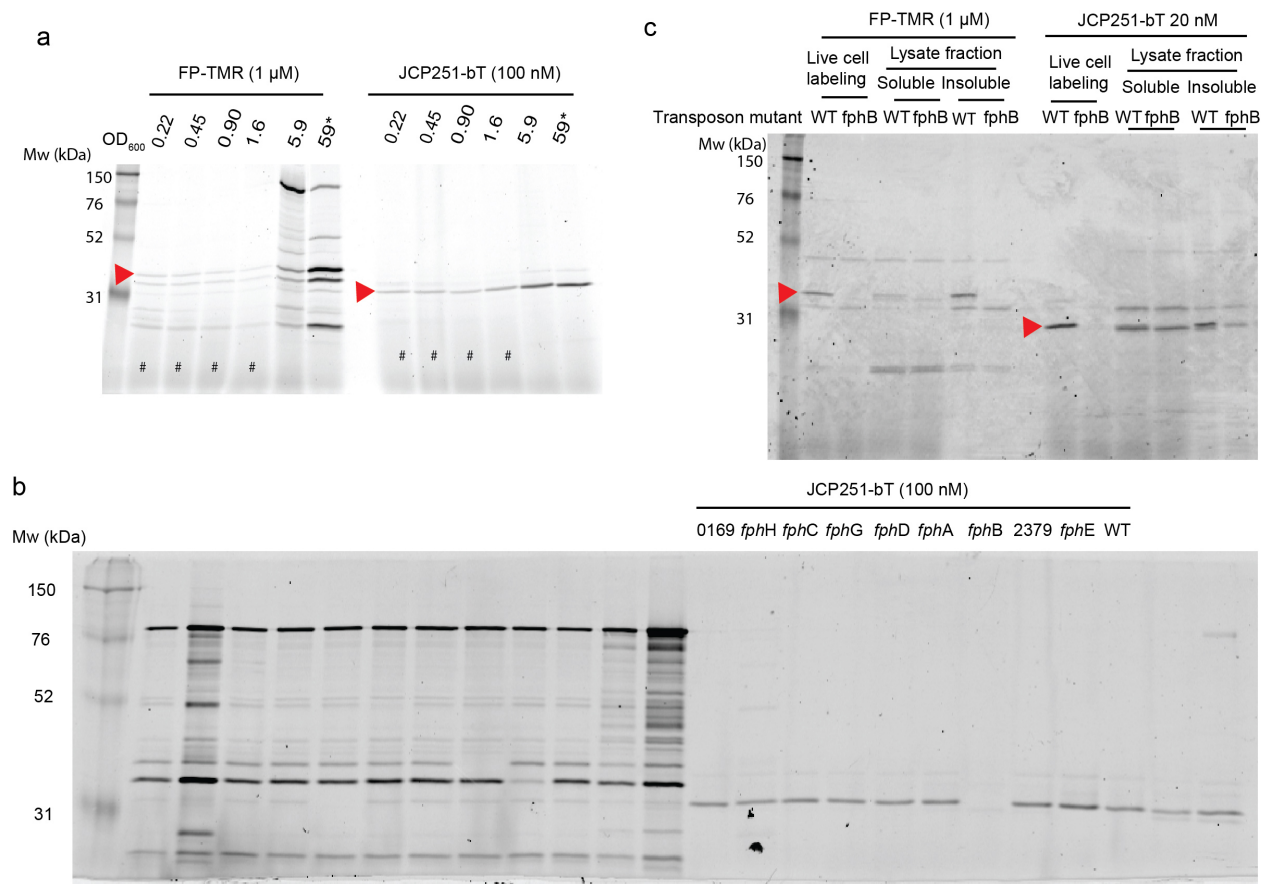

**Supplementary Figure 4. Labelling of FphB throughout various growth stages in culture.**

a) SDS-PAGE images of *S. aureus* ATCC35556 cells grown in liquid culture during exponential (OD<sub>600</sub> 0.22 – 1.6) and stationary phase (OD<sub>600</sub> = 5.9) to the indicated OD<sub>600</sub> and then labeled for 30 min with FP-TMR (1  $\mu$ M) or JCP251-bdpTMR (100 nM). Samples were lysed and analyzed by SDS-PAGE followed by detection of TMR-fluorescence by scanning of the gel with a flatbed laser scanner. Red arrowheads indicate FphB. # indicates loading was normalized to the cell density of the most dilute sample (OD<sub>600</sub>=0.22). \* For OD<sub>600</sub> = 5.9, the stationary phase culture was concentrated 10-fold. The red arrow indicates FphB. Note that the protein runs faster in the gel when labeled with JCP251-bT compared to FP-TMR. This experiment was performed once.

b) SDS-PAGE fluorescence scan of indicated *S. aureus* transposon mutant strains labeled with JCP251-bT. Full gel image corresponding to Fig. 3d. c) SDS-PAGE fluorescence scan images of *S. aureus* Newman WT and *fphB:: $\phi$ N $\Sigma$*  labeled as live cells or in lysate with FP-TMR or JCP251-bT. Cells were grown to mid-exponential phase and either labeled with probe as live cells or alternatively, cells were lysed and fractionated before soluble and insoluble lysate fractions were labeled with probe at the indicated concentrations. The experiment was performed twice with similar results.



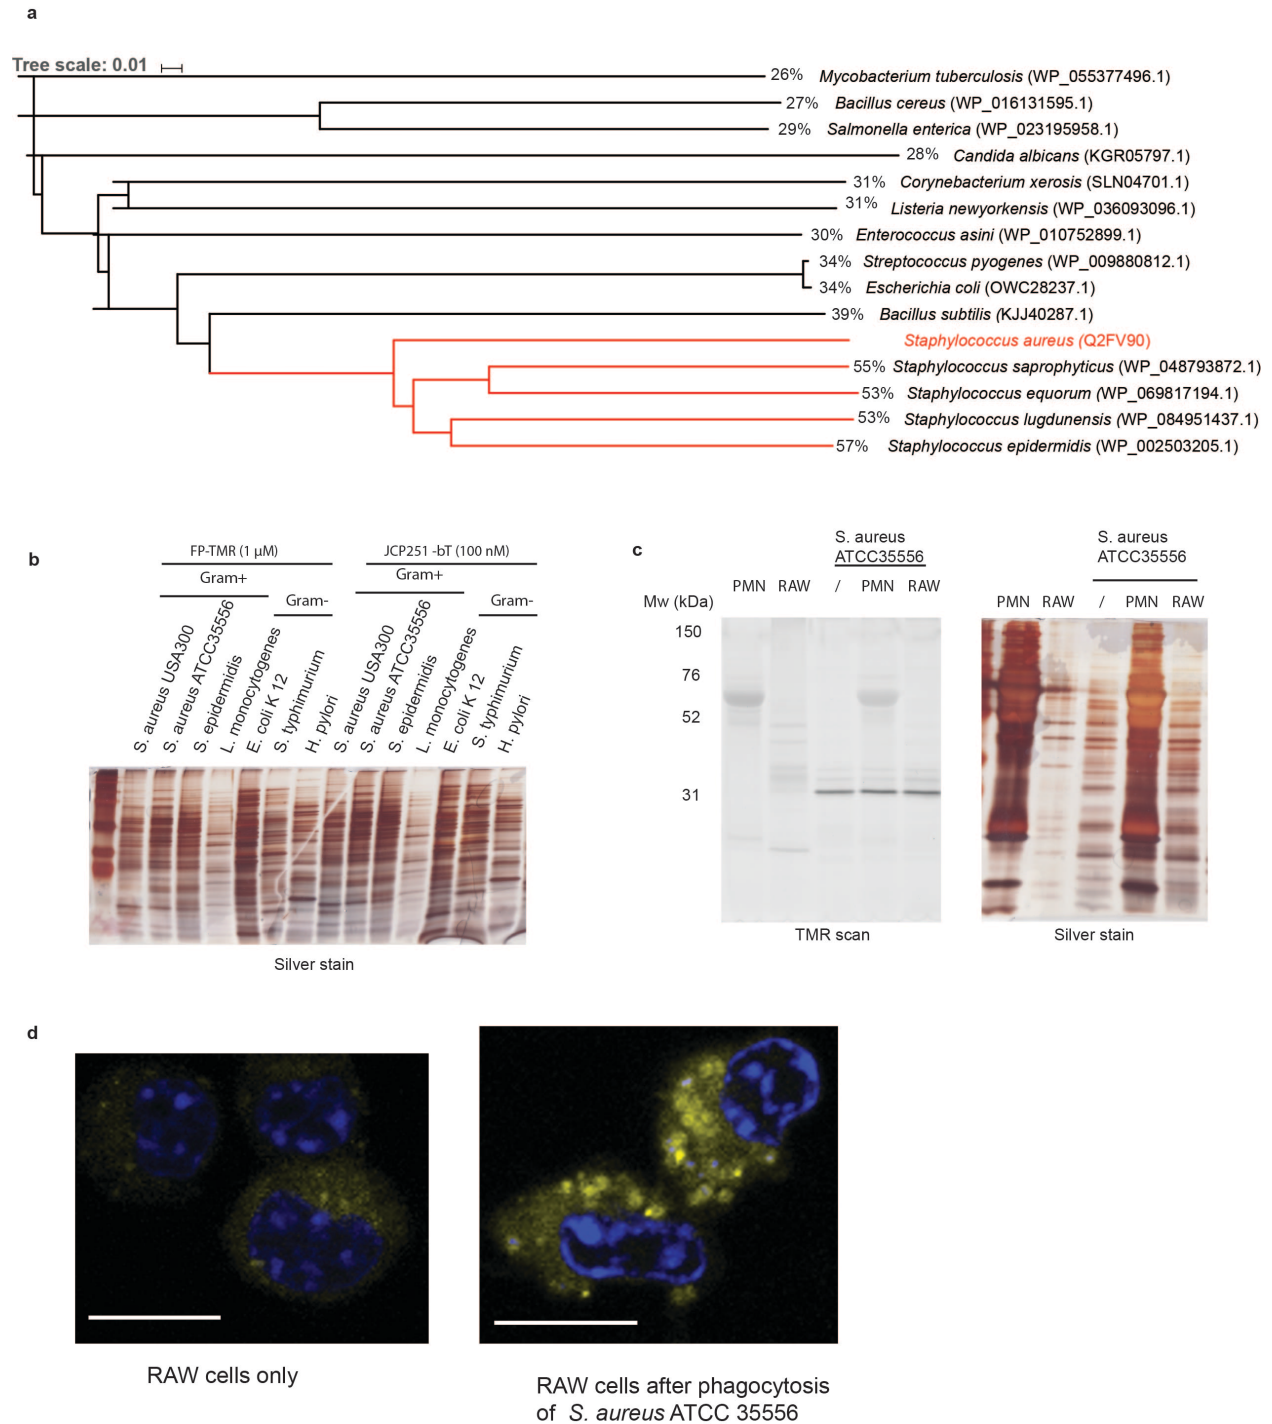

**Supplementary Figure 5. Selectivity of JCP251-bdpTMR labeling.** a) Phylogenetic tree showing the closest homologs of FphB in various prokaryotic and eukaryotic organisms. Homologous proteins were identified by blastp search. No homologs were found for *Homo sapiens*, *P. aeruginosa*, *H. pylori* and *Propionibacterium acnes*. Sequences were subjected to Clustal Omega Multiple Sequence Alignment and a phylogenetic tree generated using iTOL. Values between tree branches and organism names indicate % identity values compared to *S. aureus* FphB. b) Image of the silver stained SDS-PAGE gel from Fig. 2E showing bacterial pathogen lysates after labeling with fluorescent ABPs FP-TMR and JCP251-bdpTMR c) SDS-

PAGE gel of samples of peripheral mononuclear cells (PMN) purified from human blood, cells or the murine macrophage RAW cell line alone or co-cultured with *S. aureus* ATCC35556 60 min before labeling with 100 nM JCP251-bT. Samples were lysed and analyzed by SDS-PAGE and probe fluorescence visualized by scanning of the gel with a flatbed laser scanner (left) or total protein visualized by Silver stain (right). d) Confocal micrographs of RAW cells alone (left) and after phagocytosis of *S. aureus* ATCC35556 (right), labeled with 100 nM JCP251-bT. Blue: DAPI, Yellow: JCP251-bT labeling. Scale bar: 10  $\mu$ m. All experiments were repeated twice with similar results.

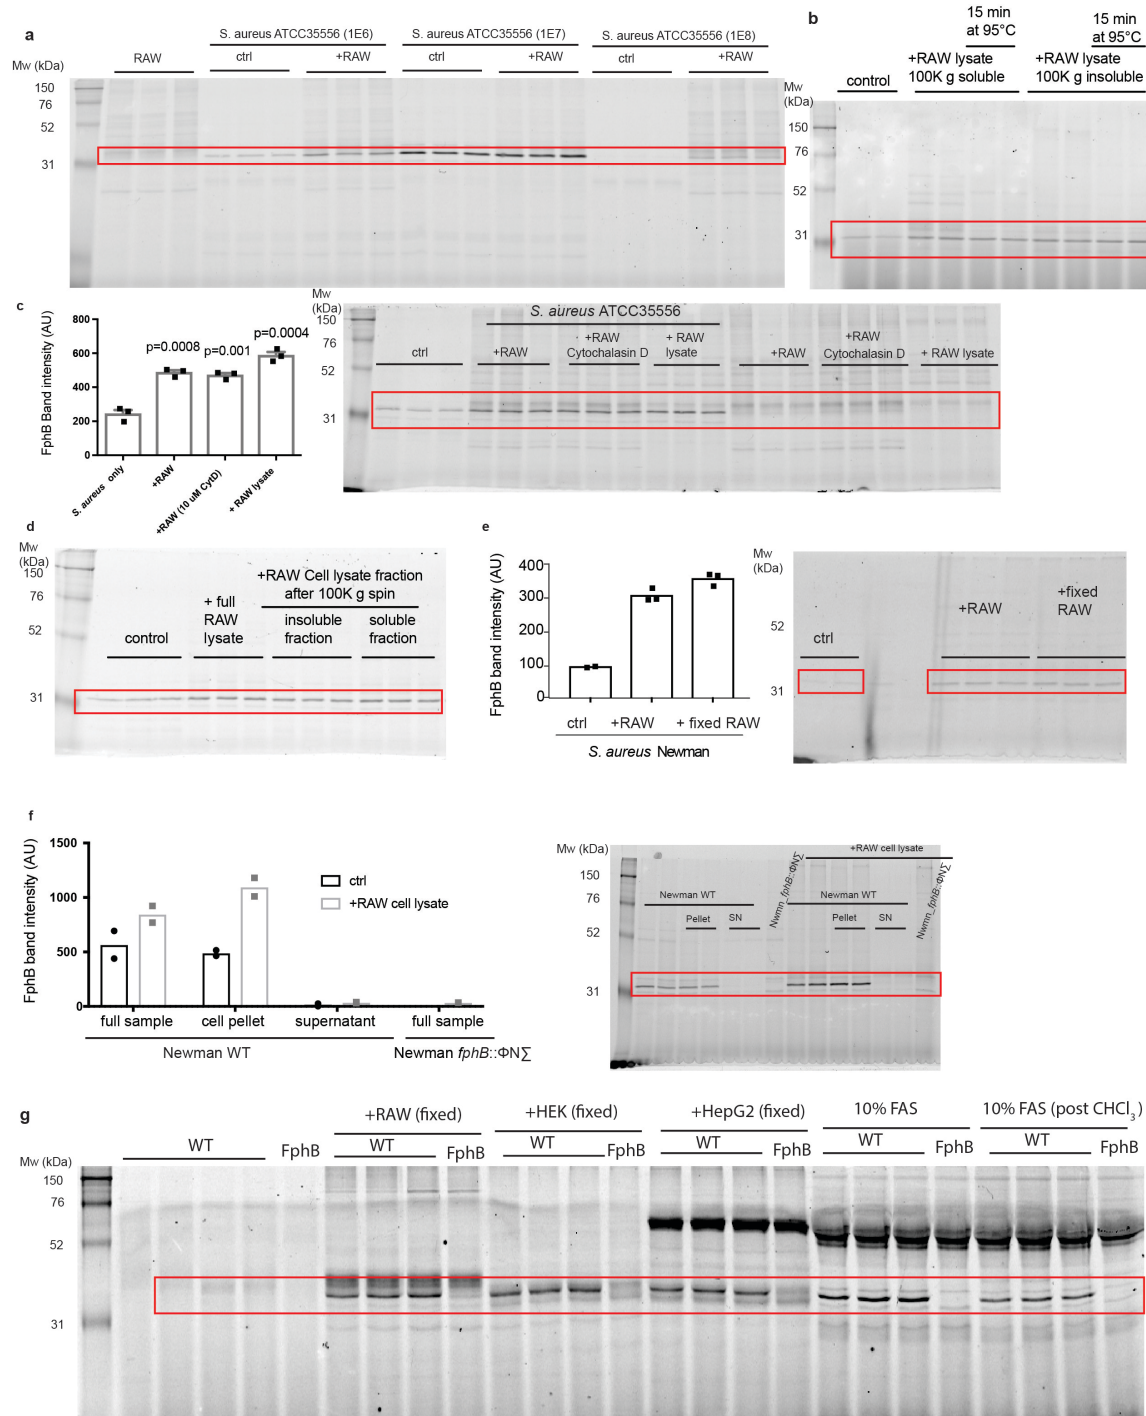



### Supplementary Figure 6. Stimulatory activity of eukaryotic cell components on FphB activity.

Graphs show JCP251-bT labeling profile *S. aureus* cells in response to different stimuli (gel images) and quantification of FphB intensities. FphB bands are highlighted in red boxes. a) *S. aureus* ATCC35556 was incubated for 90 min at indicated CFUs in the presence or absence of RAW cells ( $1E5$ ), labelled with 100 nM JCP251-bT. Gel corresponds to data shown in Fig. 4a. b) *S. aureus* ATCC35556 ( $1E7$  CFU) was grown in the presence of full RAW cell lysate or the insoluble and soluble fractions after ultracentrifugation (each equivalent to  $1E5$  cells) prior to JCP251-bT labeling (Gel corresponds to data shown in Fig. 4b) c) Left: FphB band intensity after *S. aureus* ATCC35556 ( $1E7$  CFU) were grown in the presence of RAW cells ( $1E5$ ), RAW cells pretreated with 10  $\mu$ M Cytochalasin D to block phagocytosis, or RAW cell lysate (equivalent of  $1E5$  cells) prior to JCP251-bT labeling. Graph shows means  $\pm$  SD of three independent biological samples. Statistical significance was tested using unpaired, two-tailed Student's t-test. Right: Corresponding full gel image. d) *S. aureus* ATCC35556 were treated with heat-inactivated or untreated soluble/insoluble lysate fractions after ultracentrifugation prior to JCP251-bT labeling. Gel corresponds to data shown in Fig. 4c. e) Left: FphB band intensity after *S. aureus* Newman ( $1E7$  CFU) was grown in the presence of live or PFA-fixed RAW cells prior to JCP251-bT labeling. Graph shows means  $\pm$  SD of two (ctrl) or three (stimulations) independent biological samples. Right: Corresponding full gel image. f) Left: FphB band intensity after *S. aureus* Newman ( $1E7$  CFU) were grown in the presence or absence of RAW cell lysate. After stimulation, some samples were spun down and the supernatant and cell pellet analyzed separately by SDS-PAGE analysis. Graph shows means  $\pm$  SD of two independent biological samples. Right: Corresponding full gel image. g) *S. aureus* Newman WT or *fphB:: $\phi$ N $\Sigma$*  mutant were incubated with PFA-fixed RAW cells, HEK cells, HepG2 cells, 10% Fetaplex<sup>TM</sup> Animal Serum Complex (FAS) or 10% FAS after chloroform extraction prior to labeling with JCP251-bT labeling. Gel corresponds to data shown in Fig. 4d. All experiments were repeated twice with similar results.

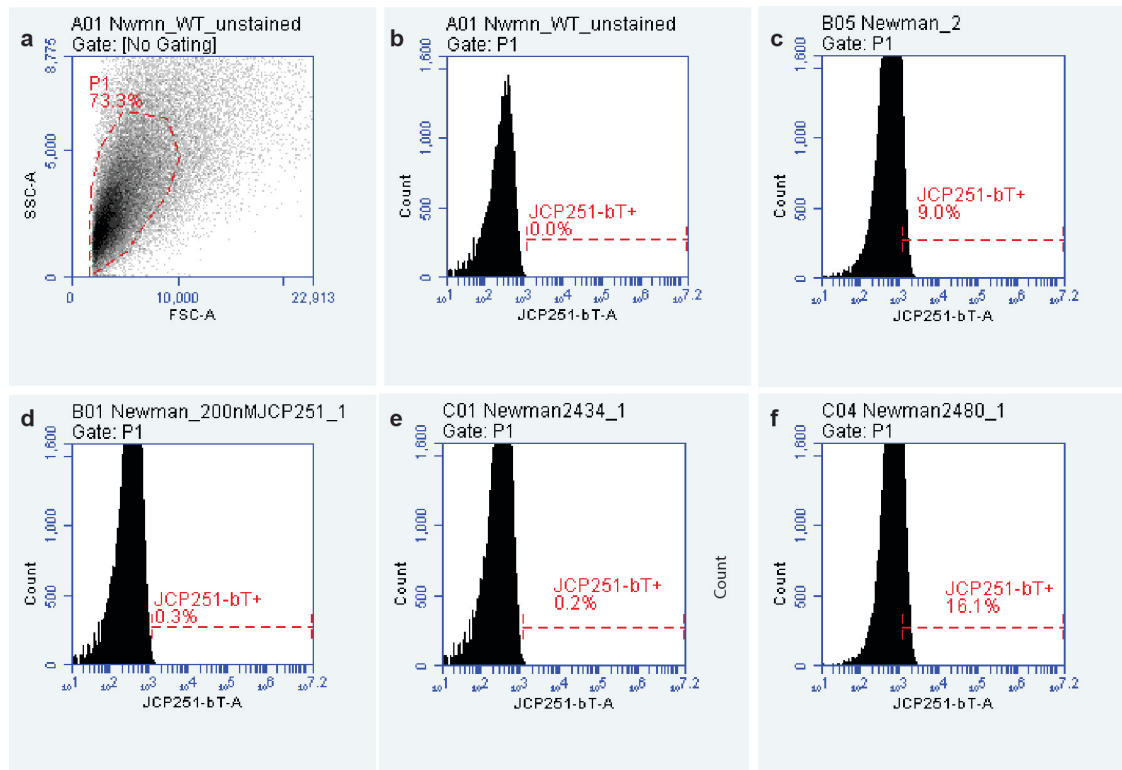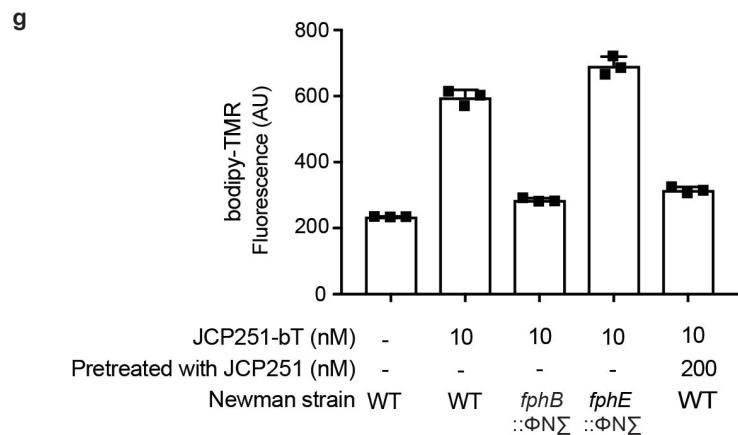

**Supplementary Figure 7. Flow cytometry analysis of JCP251-bT labeling of *S. aureus*.**

FACS scatter plot showing the region used for gating of samples (dashed red line). a) FCS-A vs. SSC-A. Gate P1 includes bacterial cells. b) Histogram of events in the P1 gate depicting bT-fluorescence against cell count of the unstained *S. aureus* Newman WT control sample. The JCP251-bT+ gate used for analysis in Fig. 3B was set accordingly. c-f) Histograms showing bT-fluorescence of c) strain Newman WT d) strain Newman WT after preincubation with 200 nM JCP251, e) strain Newman *fphB*:: $\phi$ N $\Sigma$  (Newman2434) and f) strain Newman *fphE*:: $\phi$ N $\Sigma$  (Newman2480) labeled with 10 nM JCP251-bT. g) Plot of mean bT-fluorescence intensities  $\pm$  SD of all cells in the P1 gate in arbitrary units from three biologically independent samples. The experiment was repeated twice with similar results.

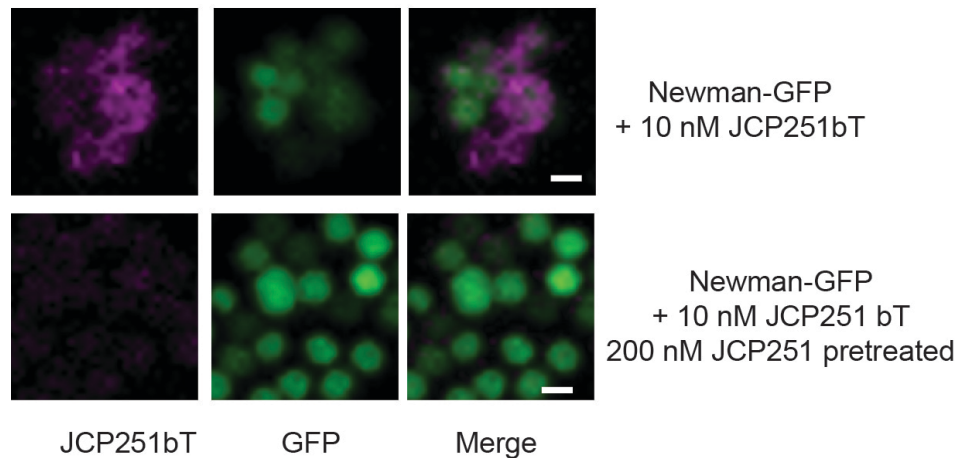

**Supplementary Figure 8. Confocal micrographs of *S. aureus* Newman-GFP.** Confocal micrographs of a *S. aureus* Newman-GFP expressing strain labeled with 10 nM JCP251-bT after pretreatment with 200 nM JCP251 or vehicle during exponential growth. GFP-fluorescence: green, bT-fluorescence: magenta. Scale bar: 1  $\mu$ m. The experiment was repeated twice with similar results.

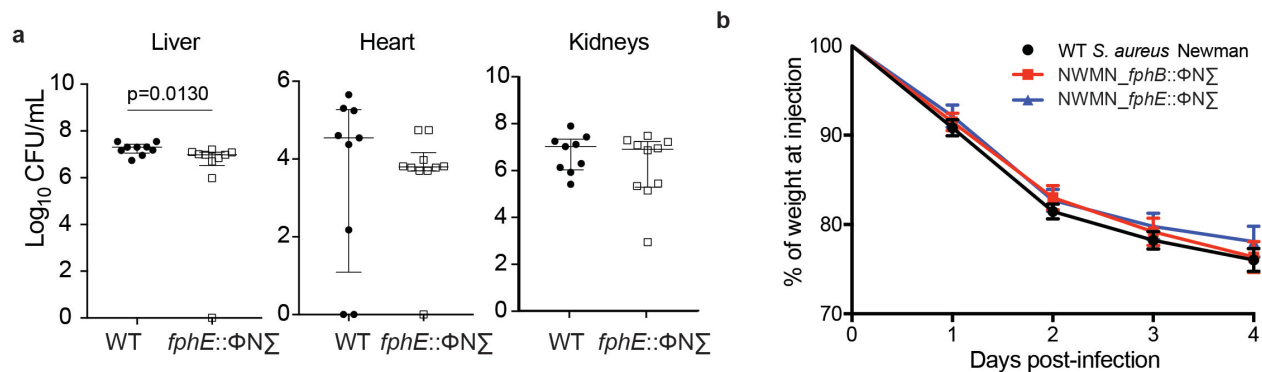

**Supplementary Figure 9. Effects of loss of FphE activity on infectivity *in vivo*.** a) Plots of total CFU recovered from indicated organs of BALB/c mice 96 hours after intravenous infection with *S. aureus* Newman WT or *fphE*:: $\phi$ N $\Sigma$ . Graphs show pooled data (median  $\pm$  interquartile range, WT:n=9, *fphE*:: $\phi$ N $\Sigma$ . n=10) from 2 independent experiments. Significance was tested by two-sided Mann-Whitney test: \**p*<0.05. c) % Weight loss of BALB/c mice at different times post i.v. infection with *S. aureus* Newman WT, *fphB*:: $\phi$ N $\Sigma$  or *fphE*:: $\phi$ N $\Sigma$  mutant. Graph shows pooled data (means  $\pm$  SD) from 2 independent experiments (WT, *fphB*:: $\phi$ N $\Sigma$ : n=9, *fphE*:: $\phi$ N $\Sigma$ : n=10).
